# Supplementary material for: Cyclic [Cu-biRadical]2 Secondary Building Unit in 2p-3d and 2p-3d-4f Complexes: Crystal Structure and Magnetic Properties
Source: MDPI journal article supplement (doi:10.3390/molecules28062514), 2023-03-09
Supplement: s1 [file s1]

# Supplementary Material

## Cyclic [Cu-biRadical]<sub>2</sub> Secondary Building Unit in 2p-3d and 2p-3d-4f Complexes: Crystal Structure and Magnetic Properties

Xiao-Tong Wang,<sup>a</sup> Xiao-Hui Huang,<sup>a</sup> Hong-Wei Song,<sup>a</sup> Yue Ma,<sup>a</sup> Li-Cun Li<sup>\*a</sup> and Jean-Pascal Sutter<sup>\*b</sup>

<sup>1</sup> *Department of Chemistry, Key Laboratory of Advanced Energy Materials Chemistry, College of Chemistry, Nankai University, Tianjin 300071, China*

<sup>2</sup> *Laboratoire de Chimie de Coordination du CNRS (LCC-CNRS), Université de Toulouse, Centre national de la recherche scientifique (CNRS), 31077, Toulouse, France*

**Table S1.** Selected bond lengths [Å] and angles [°] for **1**.

| 1 Cu              |            |                   |            |
|-------------------|------------|-------------------|------------|
| Cu(4)-O(14)       | 1.962(4)   | Cu(2)-N(8)        | 2.005(4)   |
| Cu(4)-O(11)       | 1.942(4)   | Cu(1)-O(5)        | 1.985(4)   |
| Cu(4)-O(15)       | 2.489(4)   | Cu(1)-O(4)        | 1.912(4)   |
| Cu(4)-O(12)       | 1.950(4)   | Cu(1)-O(1)        | 2.119(4)   |
| Cu(4)-N(3)        | 2.013(4)   | Cu(1)-O(3)        | 1.970(4)   |
| Cu(4)-O(13)       | 2.261(4)   | Cu(1)-O(2)        | 1.939(5)   |
| Cu(2)-O(9)        | 1.939(4)   | Cu(3)-O(20)       | 1.936(4)   |
| Cu(2)-O(8)        | 1.949(4)   | Cu(3)-O(19)       | 1.927(4)   |
| Cu(2)-O(7)        | 1.944(4)   | Cu(3)-O(16)       | 2.464(5)   |
| Cu(2)-O(6)        | 2.592(4)   | Cu(3)-O(17)       | 1.936(4)   |
| Cu(2)-O(10)       | 2.217(4)   | Cu(3)-O(18)       | 1.932(4)   |
| O(14)-Cu(4)-O(15) | 94.74(15)  | O(10)-Cu(2)-O(6)  | 178.37(16) |
| O(14)-Cu(4)-N(3)  | 93.23(17)  | N(8)-Cu(2)-O(6)   | 88.70(16)  |
| O(14)-Cu(4)-O(13) | 86.64(16)  | N(8)-Cu(2)-O(10)  | 89.76(17)  |
| O(11)-Cu(4)-O(14) | 171.53(17) | O(5)-Cu(1)-O(1)   | 100.77(16) |
| O(11)-Cu(4)-O(15) | 77.42(15)  | O(4)-Cu(1)-O(5)   | 89.57(18)  |
| O(11)-Cu(4)-O(12) | 90.75(17)  | O(4)-Cu(1)-O(1)   | 92.38(17)  |
| O(11)-Cu(4)-N(3)  | 90.03(17)  | O(4)-Cu(1)-O(3)   | 92.29(18)  |
| O(11)-Cu(4)-O(13) | 101.24(16) | O(4)-Cu(1)-O(2)   | 174.6(2)   |
| O(12)-Cu(4)-O(14) | 86.06(16)  | O(3)-Cu(1)-O(5)   | 151.89(17) |
| O(12)-Cu(4)-O(15) | 90.41(15)  | O(3)-Cu(1)-O(1)   | 107.16(17) |
| O(12)-Cu(4)-N(3)  | 179.11(19) | O(2)-Cu(1)-O(5)   | 85.48(19)  |
| O(12)-Cu(4)-O(13) | 90.48(16)  | O(2)-Cu(1)-O(1)   | 90.56(18)  |
| N(3)-Cu(4)-O(15)  | 90.19(15)  | O(2)-Cu(1)-O(3)   | 91.1(2)    |
| N(3)-Cu(4)-O(13)  | 88.94(16)  | O(20)-Cu(3)-O(16) | 95.86(16)  |
| O(13)-Cu(4)-O(15) | 178.40(14) | O(19)-Cu(3)-O(20) | 92.31(18)  |
| O(9)-Cu(2)-O(8)   | 86.01(16)  | O(19)-Cu(3)-O(16) | 91.60(16)  |
| O(9)-Cu(2)-O(7)   | 171.37(18) | O(19)-Cu(3)-O(17) | 87.55(19)  |
| O(9)-Cu(2)-O(6)   | 90.39(15)  | O(19)-Cu(3)-O(18) | 179.16(19) |
| O(9)-Cu(2)-O(10)  | 89.14(17)  | O(17)-Cu(3)-O(20) | 174.10(19) |
| O(9)-Cu(2)-N(8)   | 92.92(17)  | O(17)-Cu(3)-O(16) | 78.25(16)  |
| O(8)-Cu(2)-O(6)   | 87.71(16)  | O(18)-Cu(3)-O(20) | 87.83(18)  |
| O(8)-Cu(2)-O(10)  | 93.81(17)  | O(18)-Cu(3)-O(16) | 89.22(17)  |
| O(8)-Cu(2)-N(8)   | 176.25(18) | O(18)-Cu(3)-O(17) | 92.41(19)  |
| O(7)-Cu(2)-O(8)   | 91.53(17)  | N(1)-O(5)-Cu(1)   | 119.8(3)   |
| O(7)-Cu(2)-O(6)   | 81.24(16)  | N(6)-O(15)-Cu(4)  | 129.2(3)   |
| O(7)-Cu(2)-O(10)  | 99.28(17)  | N(2)-O(6)-Cu(2)   | 144.1(4)   |
| O(7)-Cu(2)-N(8)   | 89.00(18)  | N(7)-O(16)-Cu(3)  | 141.2(4)   |

**Table S2.** Selected bond lengths [Å] and angles [°] for **2**.

| <b>2 GdCu</b>  |          |                   |           |
|----------------|----------|-------------------|-----------|
| Gd-O(4)        | 2.373(7) | Cu(2)-O(14)       | 1.953(8)  |
| Gd-O(1)        | 2.406(6) | Cu(2)-O(11)       | 1.940(7)  |
| Gd-O(2)        | 2.373(7) | Cu(2)-O(12)       | 1.952(8)  |
| Gd-O(5)        | 2.387(6) | Cu(2)-O(13)       | 2.249(8)  |
| Gd-O(6)        | 2.358(7) | Cu(2)-N(8)        | 2.034(8)  |
| Gd-O(19)       | 2.364(7) | O(19)-N(6)        | 1.326(10) |
| Gd-O(15)       | 2.367(7) | O(15)-N(1)        | 1.316(11) |
| Gd-O(3)        | 2.415(7) | O(20)-N(7)        | 1.269(10) |
| Cu(1)-O(8)     | 1.975(7) | O(18)-N(5)        | 1.281(11) |
| Cu(1)-O(7)     | 1.945(7) | O(22)-N(10)       | 1.270(12) |
| Cu(1)-O(10)    | 2.202(7) | O(16)-N(2)        | 1.269(10) |
| Cu(1)-O(9)     | 1.930(6) | O(17)-N(4)        | 1.278(13) |
| Cu(1)-N(3)     | 2.003(8) | N(9)-O(21)        | 1.274(14) |
| O(4)-Gd-O(1)   | 146.9(2) | O(15)-Gd-O(2)     | 71.4(2)   |
| O(4)-Gd-O(5)   | 77.1(2)  | O(15)-Gd-O(5)     | 72.6(2)   |
| O(4)-Gd-O(3)   | 71.8(3)  | O(15)-Gd-O(3)     | 144.5(2)  |
| O(1)-Gd-O(3)   | 132.0(3) | O(8)-Cu(1)-O(10)  | 95.6(3)   |
| O(2)-Gd-O(4)   | 74.3(2)  | O(8)-Cu(1)-N(3)   | 169.0(3)  |
| O(2)-Gd-O(1)   | 72.6(2)  | O(7)-Cu(1)-O(8)   | 90.6(3)   |
| O(2)-Gd-O(5)   | 133.2(2) | O(7)-Cu(1)-O(10)  | 96.6(3)   |
| O(2)-Gd-O(3)   | 128.7(2) | O(7)-Cu(1)-N(3)   | 88.8(3)   |
| O(5)-Gd-O(1)   | 127.2(2) | O(9)-Cu(1)-O(8)   | 88.9(3)   |
| O(5)-Gd-O(3)   | 73.5(2)  | O(9)-Cu(1)-O(7)   | 174.1(3)  |
| O(6)-Gd-O(4)   | 139.7(2) | O(9)-Cu(1)-O(10)  | 89.3(3)   |
| O(6)-Gd-O(1)   | 73.4(2)  | O(9)-Cu(1)-N(3)   | 90.5(3)   |
| O(6)-Gd-O(2)   | 145.9(2) | N(3)-Cu(1)-O(10)  | 95.4(3)   |
| O(6)-Gd-O(5)   | 71.9(2)  | O(14)-Cu(2)-O(13) | 87.2(3)   |
| O(6)-Gd-O(19)  | 88.7(2)  | O(14)-Cu(2)-N(8)  | 88.9(3)   |
| O(6)-Gd-O(15)  | 103.7(2) | O(11)-Cu(2)-O(14) | 172.9(3)  |
| O(6)-Gd-O(3)   | 75.2(2)  | O(11)-Cu(2)-O(12) | 91.6(3)   |
| O(19)-Gd-O(4)  | 103.6(2) | O(11)-Cu(2)-O(13) | 98.8(3)   |
| O(19)-Gd-O(1)  | 69.8(2)  | O(11)-Cu(2)-N(8)  | 87.0(3)   |
| O(19)-Gd-O(2)  | 77.7(2)  | O(12)-Cu(2)-O(14) | 91.6(3)   |
| O(19)-Gd-O(5)  | 145.6(2) | O(12)-Cu(2)-O(13) | 95.3(3)   |
| O(19)-Gd-O(15) | 141.0(2) | O(12)-Cu(2)-N(8)  | 171.4(3)  |
| O(19)-Gd-O(3)  | 74.2(2)  | N(8)-Cu(2)-O(13)  | 93.3(3)   |
| O(15)-Gd-O(4)  | 90.5(2)  | N(6)-O(19)-Gd     | 131.9(5)  |
| O(15)-Gd-O(1)  | 78.6(2)  | N(1)-O(15)-Gd     | 134.3(6)  |

**Table S3.** Selected bond lengths [Å] and angles [°] for **3**.

| <b>3 TbCu</b>     |            |                   |            |
|-------------------|------------|-------------------|------------|
| Tb(1)-O(4)        | 2.366(5)   | Cu(2)-O(14)       | 1.956(5)   |
| Tb(1)-O(1)        | 2.380(5)   | Cu(2)-O(11)       | 1.945(5)   |
| Tb(1)-O(2)        | 2.366(5)   | Cu(2)-O(12)       | 1.955(6)   |
| Tb(1)-O(5)        | 2.389(5)   | Cu(2)-O(13)       | 2.253(6)   |
| Tb(1)-O(6)        | 2.366(5)   | Cu(2)-N(8)        | 2.020(6)   |
| Tb(1)-O(19)       | 2.355(5)   | O(19)-N(6)        | 1.313(7)   |
| Tb(1)-O(15)       | 2.369(5)   | O(15)-N(1)        | 1.304(8)   |
| Tb(1)-O(3)        | 2.398(5)   | O(20)-N(7)        | 1.279(8)   |
| Cu(1)-O(8)        | 1.978(5)   | O(18)-N(5)        | 1.271(8)   |
| Cu(1)-O(7)        | 1.945(5)   | O(22)-N(10)       | 1.258(9)   |
| Cu(1)-O(10)       | 2.201(5)   | O(16)-N(2)        | 1.283(8)   |
| Cu(1)-O(9)        | 1.944(5)   | O(17)-N(4)        | 1.298(10)  |
| Cu(1)-N(3)        | 2.012(5)   | N(9)-O(21)        | 1.278(11)  |
| O(4)-Tb(1)-O(1)   | 146.85(17) | O(15)-Tb(1)-O(1)  | 78.39(17)  |
| O(4)-Tb(1)-O(5)   | 76.89(17)  | O(15)-Tb(1)-O(5)  | 72.57(17)  |
| O(4)-Tb(1)-O(15)  | 90.68(18)  | O(15)-Tb(1)-O(3)  | 144.67(18) |
| O(4)-Tb(1)-O(3)   | 71.86(18)  | O(8)-Cu(1)-O(10)  | 95.4(2)    |
| O(1)-Tb(1)-O(5)   | 127.33(17) | O(8)-Cu(1)-N(3)   | 167.9(2)   |
| O(1)-Tb(1)-O(3)   | 131.97(17) | O(7)-Cu(1)-O(8)   | 91.0(2)    |
| O(2)-Tb(1)-O(4)   | 74.45(17)  | O(7)-Cu(1)-O(10)  | 95.2(2)    |
| O(2)-Tb(1)-O(1)   | 72.40(17)  | O(7)-Cu(1)-N(3)   | 88.6(2)    |
| O(2)-Tb(1)-O(5)   | 133.07(17) | O(9)-Cu(1)-O(8)   | 88.6(2)    |
| O(2)-Tb(1)-O(15)  | 71.44(17)  | O(9)-Cu(1)-O(7)   | 174.6(2)   |
| O(2)-Tb(1)-O(3)   | 128.73(18) | O(9)-Cu(1)-O(10)  | 90.1(2)    |
| O(5)-Tb(1)-O(3)   | 73.62(17)  | O(9)-Cu(1)-N(3)   | 90.6(2)    |
| O(6)-Tb(1)-O(4)   | 139.53(17) | N(3)-Cu(1)-O(10)  | 96.6(2)    |
| O(6)-Tb(1)-O(1)   | 73.61(16)  | O(14)-Cu(2)-O(13) | 87.0(2)    |
| O(6)-Tb(1)-O(2)   | 145.96(17) | O(14)-Cu(2)-N(8)  | 89.1(2)    |
| O(6)-Tb(1)-O(5)   | 71.85(17)  | O(11)-Cu(2)-O(14) | 173.1(2)   |
| O(6)-Tb(1)-O(15)  | 103.51(17) | O(11)-Cu(2)-O(12) | 91.6(2)    |
| O(6)-Tb(1)-O(3)   | 75.10(17)  | O(11)-Cu(2)-O(13) | 98.5(2)    |
| O(19)-Tb(1)-O(4)  | 103.85(17) | O(11)-Cu(2)-N(8)  | 86.4(2)    |
| O(19)-Tb(1)-O(1)  | 69.70(16)  | O(12)-Cu(2)-O(14) | 92.2(2)    |
| O(19)-Tb(1)-O(2)  | 77.92(17)  | O(12)-Cu(2)-O(13) | 94.6(3)    |
| O(19)-Tb(1)-O(5)  | 145.57(17) | O(12)-Cu(2)-N(8)  | 171.5(3)   |
| O(19)-Tb(1)-O(6)  | 88.63(17)  | N(8)-Cu(2)-O(13)  | 93.9(2)    |
| O(19)-Tb(1)-O(15) | 141.05(16) | N(6)-O(19)-Tb(1)  | 132.6(4)   |
| O(19)-Tb(1)-O(3)  | 74.06(17)  | N(1)-O(15)-Tb(1)  | 134.9(4)   |

**Table S4.** Selected bond lengths [Å] and angles [°] for **4**.

| <b>4 DyCu</b>  |            |                   |           |
|----------------|------------|-------------------|-----------|
| Dy-O(4)        | 2.347(5)   | Cu(2)-O(14)       | 1.975(6)  |
| Dy-O(1)        | 2.380(5)   | Cu(2)-O(11)       | 1.937(6)  |
| Dy-O(2)        | 2.356(5)   | Cu(2)-O(12)       | 1.945(6)  |
| Dy-O(5)        | 2.392(6)   | Cu(2)-O(13)       | 2.259(8)  |
| Dy-O(6)        | 2.347(5)   | Cu(2)-N(8)        | 2.034(7)  |
| Dy-O(19)       | 2.337(5)   | O(19)-N(6)        | 1.319(9)  |
| Dy-O(15)       | 2.358(5)   | O(15)-N(1)        | 1.290(8)  |
| Dy-O(3)        | 2.392(5)   | O(20)-N(7)        | 1.271(8)  |
| Cu(1)-O(8)     | 1.986(5)   | O(18)-N(5)        | 1.284(9)  |
| Cu(1)-O(7)     | 1.945(5)   | O(22)-N(10)       | 1.266(10) |
| Cu(1)-O(10)    | 2.206(6)   | O(16)-N(2)        | 1.278(9)  |
| Cu(1)-O(9)     | 1.942(5)   | O(17)-N(4)        | 1.278(11) |
| Cu(1)-N(3)     | 2.019(6)   | N(9)-O(21)        | 1.277(12) |
| O(4)-Dy-O(1)   | 147.4(2)   | O(15)-Dy-O(1)     | 78.05(19) |
| O(4)-Dy-O(2)   | 74.3(2)    | O(15)-Dy-O(5)     | 72.66(19) |
| O(4)-Dy-O(5)   | 76.60(19)  | O(15)-Dy-O(3)     | 145.0(2)  |
| O(4)-Dy-O(15)  | 91.0(2)    | O(8)-Cu(1)-O(10)  | 95.8(2)   |
| O(4)-Dy-O(3)   | 72.0(2)    | O(8)-Cu(1)-N(3)   | 167.4(2)  |
| O(1)-Dy-O(5)   | 127.08(19) | O(7)-Cu(1)-O(8)   | 91.6(2)   |
| O(1)-Dy-O(3)   | 131.63(19) | O(7)-Cu(1)-O(10)  | 95.0(2)   |
| O(2)-Dy-O(1)   | 73.12(19)  | O(7)-Cu(1)-N(3)   | 88.1(2)   |
| O(2)-Dy-O(5)   | 132.60(19) | O(9)-Cu(1)-O(8)   | 88.7(2)   |
| O(2)-Dy-O(15)  | 71.35(19)  | O(9)-Cu(1)-O(7)   | 174.9(2)  |
| O(2)-Dy-O(3)   | 128.8(2)   | O(9)-Cu(1)-O(10)  | 90.0(2)   |
| O(5)-Dy-O(3)   | 73.67(19)  | O(9)-Cu(1)-N(3)   | 90.6(2)   |
| O(6)-Dy-O(4)   | 139.91(19) | N(3)-Cu(1)-O(10)  | 96.8(2)   |
| O(6)-Dy-O(1)   | 72.71(19)  | O(14)-Cu(2)-O(13) | 86.5(3)   |
| O(6)-Dy-O(2)   | 145.77(19) | O(14)-Cu(2)-N(8)  | 88.4(3)   |
| O(6)-Dy-O(5)   | 72.44(19)  | O(11)-Cu(2)-O(14) | 172.6(3)  |
| O(6)-Dy-O(15)  | 103.16(19) | O(11)-Cu(2)-O(12) | 92.0(3)   |
| O(6)-Dy-O(3)   | 75.25(19)  | O(11)-Cu(2)-O(13) | 98.8(3)   |
| O(19)-Dy-O(4)  | 103.47(19) | O(11)-Cu(2)-N(8)  | 86.1(3)   |
| O(19)-Dy-O(1)  | 70.21(18)  | O(12)-Cu(2)-O(14) | 92.5(3)   |
| O(19)-Dy-O(2)  | 77.93(19)  | O(12)-Cu(2)-O(13) | 95.8(3)   |
| O(19)-Dy-O(5)  | 145.71(19) | O(12)-Cu(2)-N(8)  | 170.5(3)  |
| O(19)-Dy-O(6)  | 88.83(19)  | N(8)-Cu(2)-O(13)  | 93.7(3)   |
| O(19)-Dy-O(15) | 140.92(19) | N(6)-O(19)-Dy     | 133.1(5)  |
| O(19)-Dy-O(3)  | 73.89(19)  | N(1)-O(15)-Dy     | 134.3(5)  |

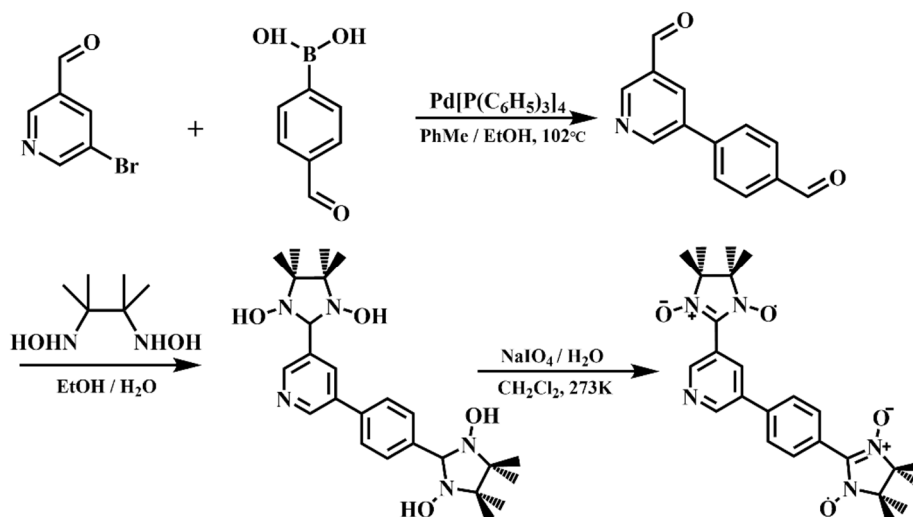

**Scheme S1.** The synthesis of bi-NIT-3Py-5-Ph radical ligand.

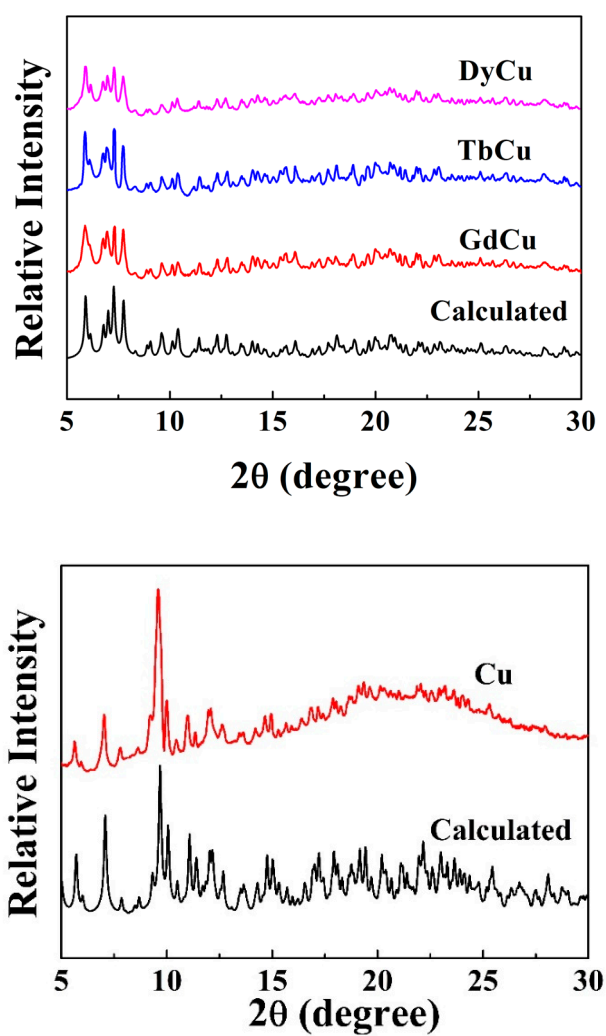

**Figure S1.** The Powder X-ray diffraction (PXRD) patterns for all complexes at room temperature.

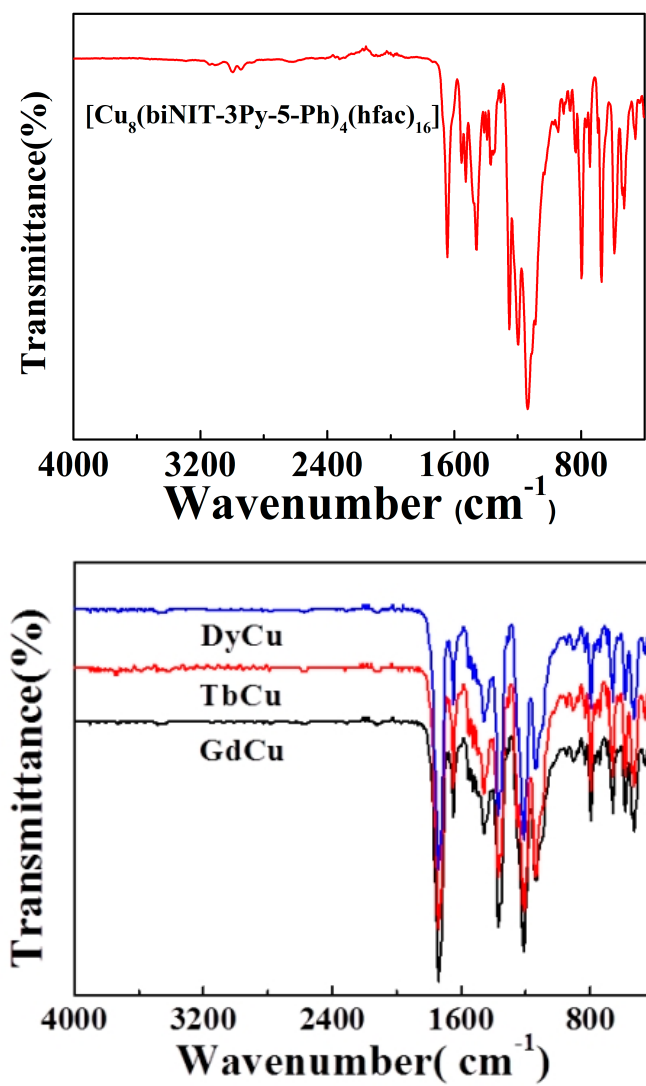

**Figure S2.** The IR spectra for complexes 1-4.

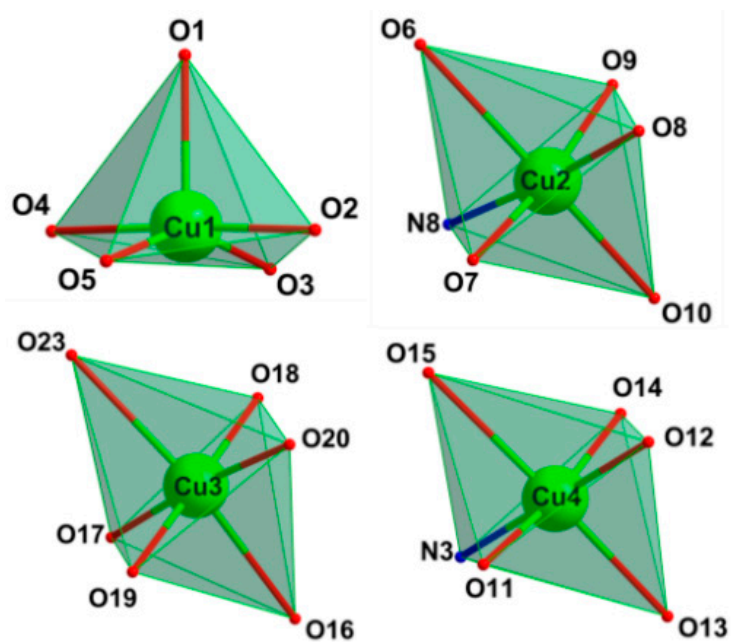

**Figure S3.** The coordination polyhedra of Cu<sup>II</sup> ions.

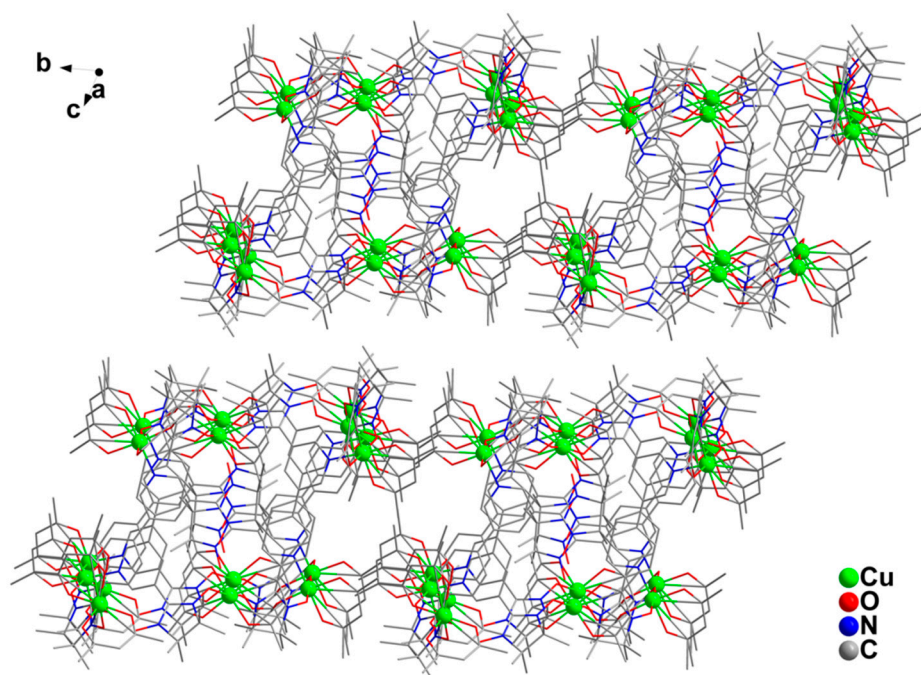

**Figure S4.** Packing diagram of complex **1** (Fluorine and Hydrogen atoms are omitted for the sake of clarity).



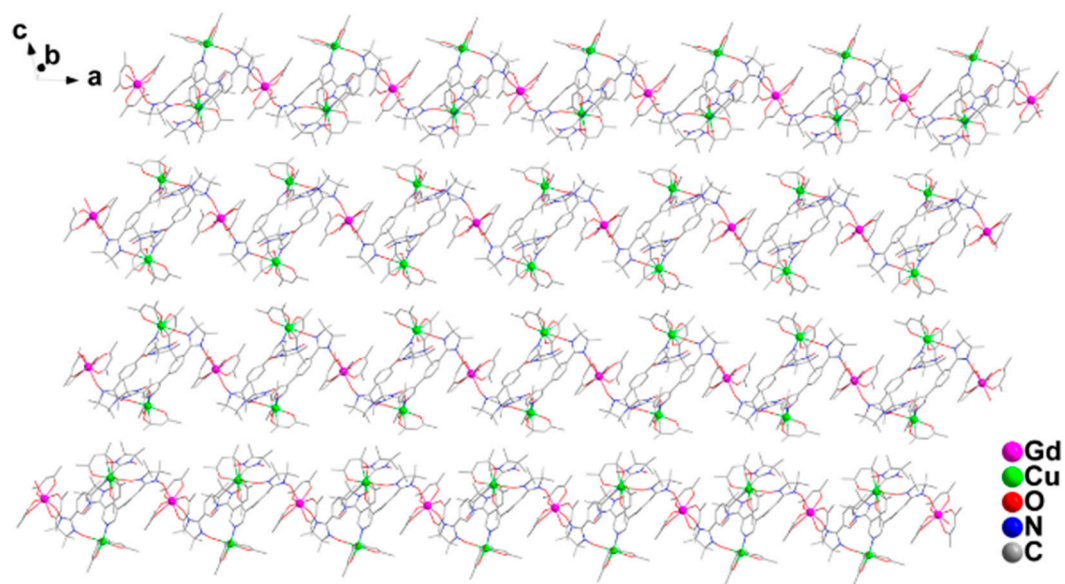

**Figure S5.** Packing diagram of complex **2**. (Hydrogen and fluorine atoms are not shown for the sake of clarity).

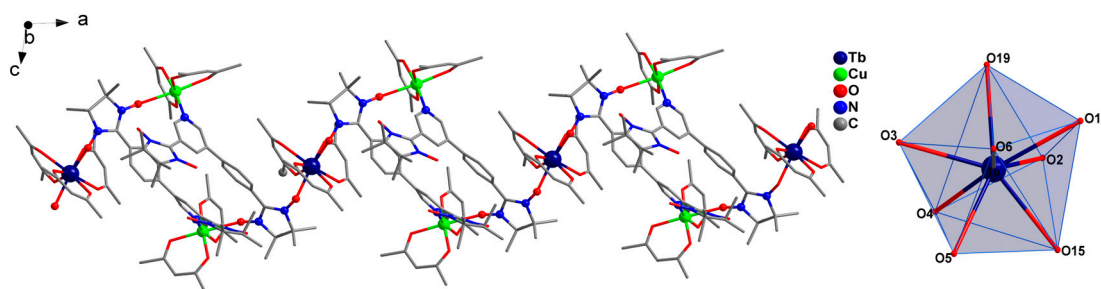

**Figure S6.** One-dimensional structure of **3** and local coordination geometry of Tb<sup>III</sup> ion (Fluorine and Hydrogen atoms are omitted for the sake of clarity).

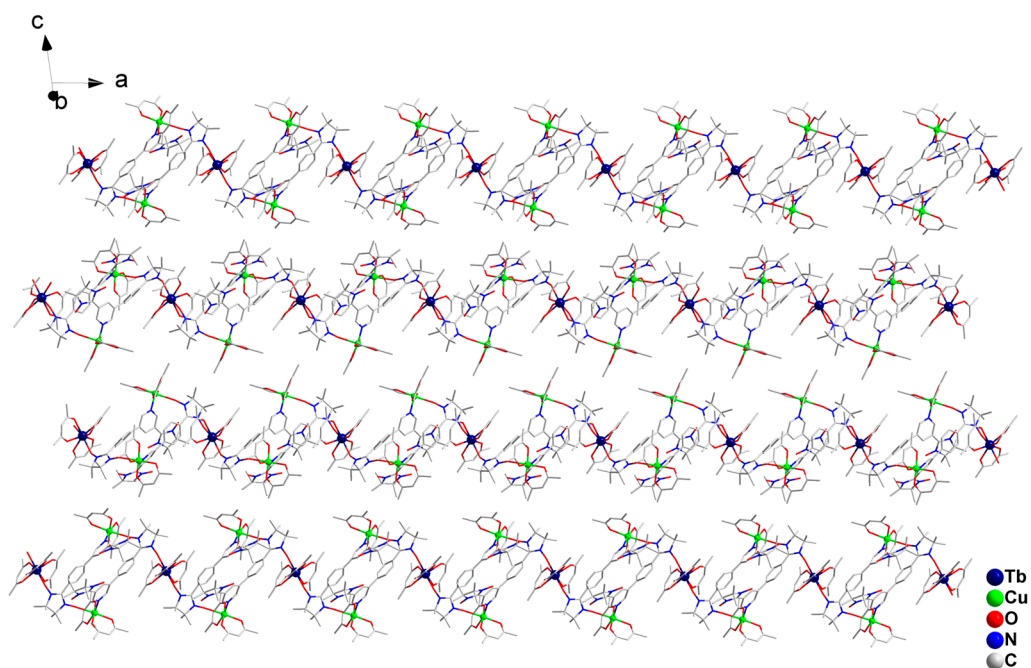

**Figure S7.** Packing diagram of complex **3** (Fluorine and Hydrogen atoms are omitted for the sake of clarity).

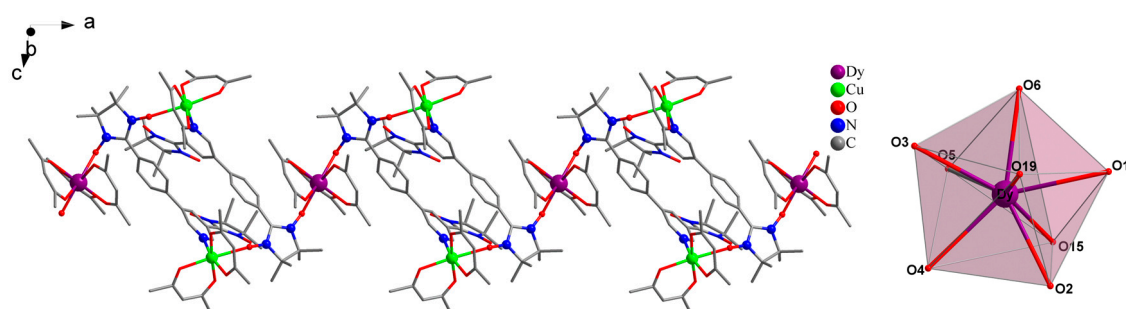

**Figure S8.** One-dimensional structure of **4** and local coordination geometry of Dy<sup>III</sup> ion (Fluorine and Hydrogen atoms are omitted for the sake of clarity).

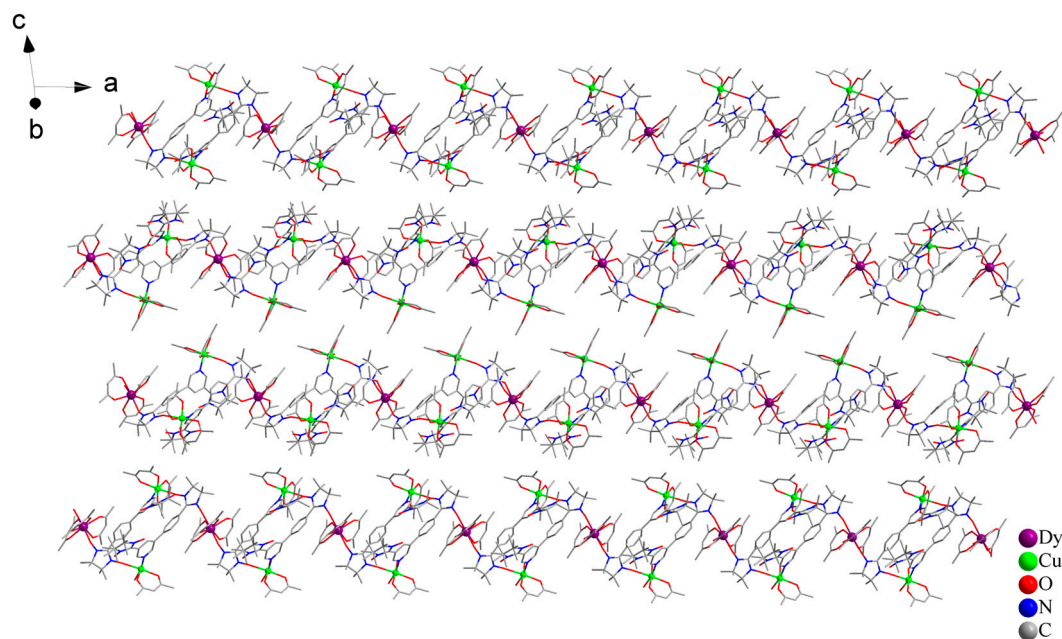

**Figure S9.** Packing diagram of complex **4** (Fluorine and Hydrogen atoms are omitted for the sake of clarity).

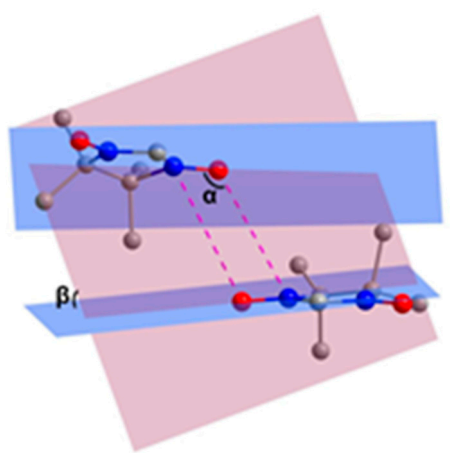

**Figure S10.** The relative disposition and the close contacts between the uncoordinated NO groups in **2**.

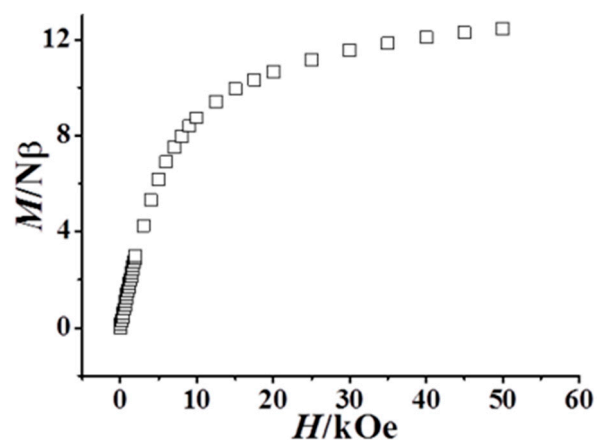

**Figure S11.** Field-dependent magnetization for **2** at 2.0 K.

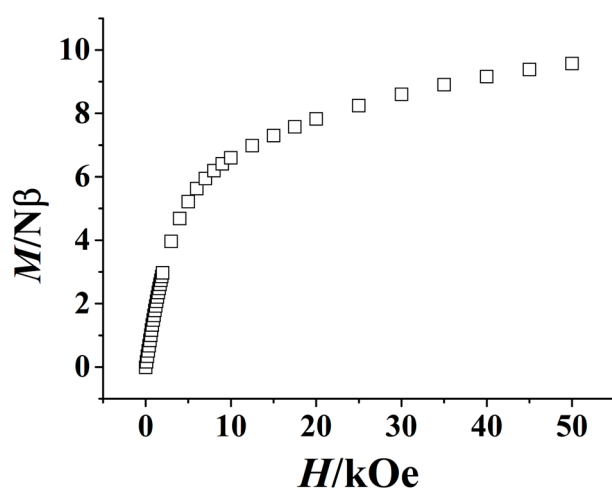

**Figure S12.** Field-dependent magnetization for **3** at 2.0 K.

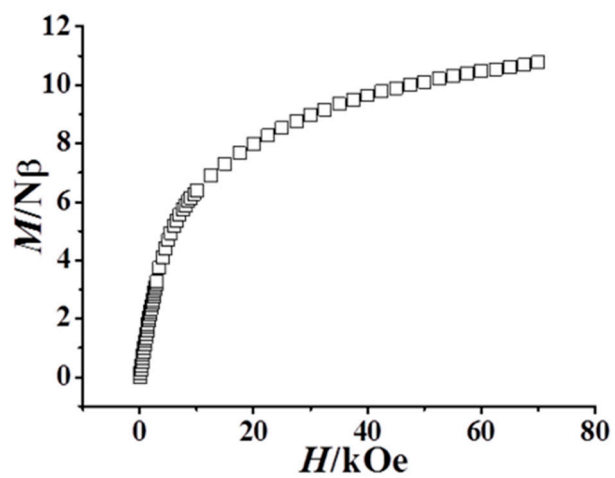

**Figure S13.** Field-dependent magnetization for **4** at 2.0 K.

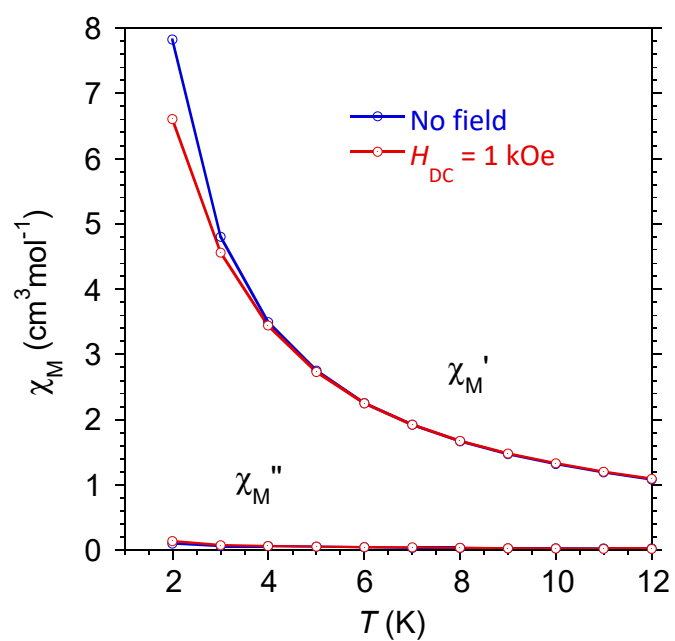

**Figure S14.** Frequency-dependent ac signals of the  $\chi'$  (top) and  $\chi''$  (bottom) under 1 kOe dc field for compound 3.

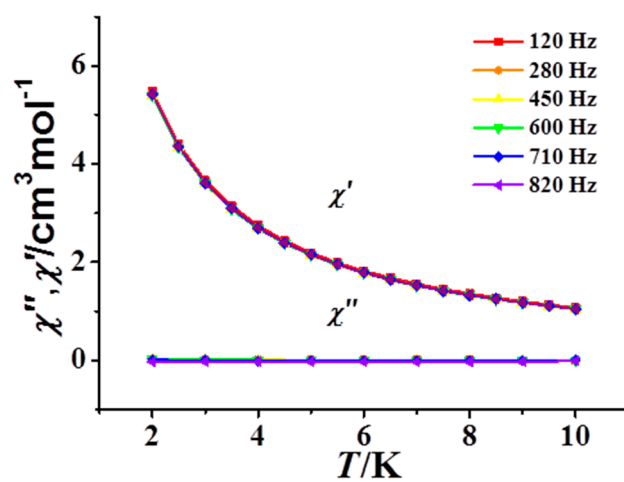

**Figure S15.** Frequency-dependent ac signals of the  $\chi'$  (top) and  $\chi''$  (bottom) for compound 4.
